# Supplementary material for: Transfer of congenital heart patients from paediatric to adult services in England
Source: HighWire-hosted journal article supplement (doi:10.1136/heartjnl-2022-321085), 2022-07-06
Supplement: heartjnl-2022-321085supp001_data_supplement.pdf [file heartjnl-2022-321085supp001_data_supplement.pdf]

## How successful is transfer from paediatric to adult services for patients with congenital heart disease?

### SUPPLEMENTARY MATERIAL

#### 1. Patient Selection

As described in the main manuscript Figure 1, we selected patients born between 1 April 1987 and 31 March 2000, having a CHD procedure (excluding heart transplant) as children in public hospitals from England, known to be alive at age 16, and with Hospital Episode Statistic (HES) data successfully linked to their National CHD Audit (NCHDA) records in the LAUNCHES dataset (LAUNCHES stands for “Linking Audit and National datasets in Congenital Heart Services for Quality Improvement”). Life status was ascertained using ONS mortality registry; when linkage to ONS was not available, their clinical records were used. Patients were required to have had a CHD procedure as children in NCHDA, the UK national registry of CHD procedures. Heart transplants were excluded from the analysis because care in adulthood post-transplant remains with the transplanting centre. Most of the restrictions were posed by the need to have outpatient and inpatient data at ages 16-20 for the cohorts of analysis, as such attendance data was only available from HES data for public hospitals in England from 1 April 2003 onwards (Figure S1). The main known reasons for non-linkage of NCHDA to HES were: missing NHS number; residence not recorded or outside England; and/or record from before 2003 when data quality was poorer.

#### 2. Identifying Transfer to ACHD Services

Successful transfer to specialist ACHD services was assigned when the patient was seen in cardiology out-patients or admitted as a cardiology in-patient in a recognised specialist ACHD centre, or one of its affiliated outreach centres. This outcome assignment required the identification of cardiac contacts (at inpatient or outpatient services) and the identification of ACHD hospitals. We required the transfers to take place at ages 16 to end of 21 (full cohort) or to end of age 19 (severe and moderately complex patients).

#### Cardiac contacts

1. Outpatient Cardiac Appointments were identified in HES data using the Treatment Speciality (TRETSPPEF) field from HES OP (before 2004/05, TRETSPPEF contained the consultant speciality instead of treatment speciality).
  - 1.1. Only the treatment specialities in Table S1 were considered indicators of ACHD appointments.
  - 1.2. Patient attendance to outpatient appointments was recorded in HES by all centres. Only cardiac appointments were used in the analyses as evidence of patient contact with CHD services.
2. Inpatient Cardiac Admissions were identified in HES data using the following Healthcare Resource Group (HRG) codes, noting different structural HRG versions during the period of study:
  - 2.1. E-codes (Cardiac surgery and primary cardiac conditions);
  - 2.2. HRG3 code : P25 (Cardiac conditions);
  - 2.3. HRG4 codes: PA22Z (Chest pain), PA23A and PA23B (Cardiac conditions with/without complications and comorbidities (CC)), and PA24Z (Arrhythmia or conduction disorders).
  - 2.4. HRG4+ codes: PE23A-PE23F (Paediatric cardiac conditions, with different CC scores), PE24A-PE24C (Paediatric arrhythmia or conduction disorders, with different CC scores), and PE62A-PE62C (Paediatric syncope and collapse, with different CC scores).
3. All NCHDA reported procedures were considered to be cardiac contacts.

### ACHD hospital levels

1. Hospitals in HES data were classified as Adult CHD Level 1, Level 2, Level3 or outreach according National Service Standards and Specifications (11) and are found in Table S2. The purely paediatric hospitals (horizontal model) were identified using Table S3.
2. Hospitals in NCHDA were classified as ACHD hospitals (some admitting children as well) except for 3 purely paediatric level 1 hospitals (Alder Hey Hospital, Birmingham Children's Hospital, and Great Ormond Street Hospital for Children).

### 3. Patient Characteristics at Baseline

1. Birth Cohort was assigned using the LAUNCHES revised patient level date of birth (both year and month of birth were available).
2. Sex was assigned as the mode of the NCHDA record level "gender" field over all patient records (not just the records before age 16). Where it was missing the mode over all patient records of the HES record level "sex" field was used.
3. Ethnicity was assigned in a similar way, where non-white groups were merged together.
4. Area Deprivation. We use the postcode-derived quintile of Index of multiple deprivation (QIMD) from the last HES record of the patient before age 16. The first two quintiles (Q1, Q2) were assigned as Deprived Area, and the rest (Q3,4,5) were assigned non-deprived.  
<https://www.gov.uk/government/collections/english-indices-of-deprivation>
5. Treatment in Purely Paediatric Level 1 Hospital as child was identified if the patient had had a cardiac contact (definition in previous section) before age 16 in any of the paediatric-only CHD Level 1 hospitals (definition in previous section).
6. Complexity Classification. A complexity classification (mild, moderate, severe) in accordance with current ESC guidelines was assigned using both NCHDA diagnostic and procedural categories and HES ICD-10 diagnostic codes. We first assigned a complexity classification to each NCHDA primary diagnosis category (Table S4), HES ICD-10 diagnosis codes (Table S5), and NCHDA specific procedure category (Table S6). Then, for each patient the most severe complexity classification over their records before age 16 was assigned as patient complexity classification at baseline for all analyses.

### 4. Statistical Analysis

For some patients (depending on their birth cohort as per Figure S1) the data did not cover the whole period of follow-up ages, 16 to end of 19<sup>th</sup> year or end of 21<sup>st</sup> year, and right-censored outcomes and time-to-event ages were used (rather than deleting the censored cohorts). Patients' death without transfer was not considered a (non-informative) censoring event, but a competing risk outcome that prevents transfer to ACHD services and as such it needs to be reported separately. The main paper provides tables with outcome and censoring numbers at endpoint. Competing Risk Analysis tools were used such as Conditional Probability Functions (CPFs) over the period of ages, estimating at any time point the probability of patients being transferred to ACHD services conditional on being alive. Alternative pairs of complementary Conditional Incidence Functions for the two competing outcomes (transfer versus death before transfer) were tested, but the differences in the Cumulative Incidence Function (CIF) of death were not significant (small numbers) and interpreting the complementary CIF of transfer was not possible ignoring the CIFs of death; we opted to report deaths separately and to show CPF probabilities of transfer conditional on being alive. Average (with 95% CI) CPF curves were shown in figures 2, 3, and S2; average (with 95% CI) CPF values were tabulated at end of follow-up (tables 2 and 3).

We estimated the odds ratios of transfer at end point using a multivariable logistic regression model (Table 4). The considered covariates are reported above as “patient characteristics at baseline”. All variables that were significant in single variable logistic regressions at end point were included in the multivariable model. The sample used for the logistic regression analyses were moderate and severe complexity patients that were alive and with data by their 20<sup>th</sup> birthday (born before 1998/99). We clustered the standard errors by last centre before age 16 to account for differences in transfer assignment by centre (further than the care model tested as risk factor). Centres before age 16 with small numbers were excluded; in practice this resulted in excluding two patients, the final sample size for the logistic regression analysis being N=4,036 (reported in Note to Table 4).

For the severe and moderate complexity patients alive and with data at age 20, we further looked at their survival probability (Kaplan Meier estimate of risk of death in Figure 4A) and their probability of getting a congenital cardiac procedure as recorded in the NCHDA audit (CPF of the probability of NCHDA procedure conditional on being alive in Figure 4B).

## FIGURES AND TABLES

**Figure S1.** Years covered by the LAUNCHES dataset and age overlap with the cohorts of analysis.

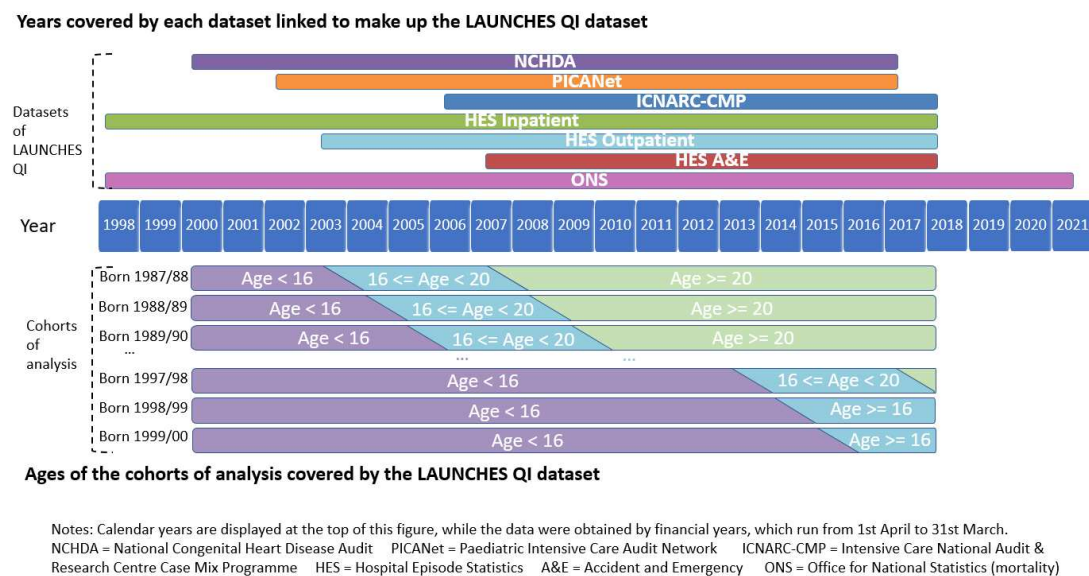

**Table S1.** Treatment specialities (code and description) considered as indicative of cardiac contacts in Hospital Episodes Statistics outpatient records.

| Treatment Speciality Code | Treatment Speciality Description                                                                      |
|---------------------------|-------------------------------------------------------------------------------------------------------|
| 170                       | Cardiothoracic Surgery (Where There Are No Separate Services for Cardiac and Thoracic Surgery)        |
| 172                       | Cardiac Surgery                                                                                       |
| 174                       | Cardiothoracic Transplantation (Recognised Specialist Services Only - Includes 'Outreach' Facilities) |

|     |                                                    |
|-----|----------------------------------------------------|
| 221 | Paediatric Cardiac Surgery (From 2006-07)          |
| 320 | Cardiology                                         |
| 321 | Paediatric Cardiology                              |
| 331 | Congenital Heart Disease Service (From April 2013) |

**Table S2.** Classification of hospital providers in Hospital Episode Statistics data by adult congenital heart disease level. It includes vertical model centres.

| Provider Code | Provider Description                                                                                       | ACHD Level          |
|---------------|------------------------------------------------------------------------------------------------------------|---------------------|
| RNJ           | BARTS AND THE LONDON NHS TRUST                                                                             | Level 1             |
| R1H           | BARTS HEALTH NHS TRUST                                                                                     | Level 1             |
| RW3           | CENTRAL MANCHESTER UNIVERSITY HOSPITALS NHS FOUNDATION TRUST                                               | Level 1             |
| RJ1           | GUY'S AND ST THOMAS' NHS FOUNDATION TRUST (including Evelina London Children's Hospital)                   | Level 1 (also paed) |
| RR8           | LEEDS TEACHING HOSPITALS NHS TRUST                                                                         | Level 1 (also paed) |
| RBQ           | LIVERPOOL HEART AND CHEST HOSPITAL NHS FOUNDATION TRUST                                                    | Level 1             |
| RT3           | ROYAL BROMPTON & HAREFIELD NHS FOUNDATION TRUST                                                            | Level 1 (also paed) |
| RQ6           | ROYAL LIVERPOOL AND BROADGREEN UNIVERSITY HOSPITALS NHS TRUST                                              | Level 1             |
| RTD           | THE NEWCASTLE UPON TYNE HOSPITALS NHS FOUNDATION TRUST                                                     | Level 1             |
| RRV           | UNIVERSITY COLLEGE LONDON HOSPITALS NHS FOUNDATION TRUST                                                   | Level 1             |
| RHM           | UNIVERSITY HOSPITAL SOUTHAMPTON NHS FOUNDATION TRUST                                                       | Level 1 (also paed) |
| RRK           | UNIVERSITY HOSPITALS BIRMINGHAM NHS FOUNDATION TRUST                                                       | Level 1             |
| RA7           | UNIVERSITY HOSPITALS BRISTOL AND WESTON NHS FOUNDATION TRUST (including Bristol Royal Children's Hospital) | Level 1 (also paed) |
| RWE           | UNIVERSITY HOSPITALS OF LEICESTER NHS TRUST                                                                | Level 1 (also paed) |
| R1H           | BARTS HEALTH NHS TRUST                                                                                     | Level 1             |
| RBQ           | LIVERPOOL HEART AND CHEST HOSPITAL NHS FOUNDATION TRUST                                                    | Level 1             |
| RXH           | BRIGHTON AND SUSSEX UNIVERSITY HOSPITALS NHS TRUST                                                         | Level 2             |
| ROA           | MANCHESTER UNIVERSITY NHS FOUNDATION TRUST                                                                 | Level 2             |
| RM1           | NORFOLK AND NORWICH UNIVERSITY HOSPITALS NHS FOUNDATION TRUST                                              | Level 2             |
| RTH           | OXFORD UNIVERSITY HOSPITALS NHS FOUNDATION TRUST                                                           | Level 2             |
| RGM           | ROYAL PAPWORTH HOSPITAL NHS FOUNDATION TRUST                                                               | Level 2             |
| RXL           | BLACKPOOL TEACHING HOSPITALS NHS FOUNDATION TRUST                                                          | Level 3             |
| RJF           | BURTON HOSPITALS NHS FOUNDATION TRUST                                                                      | Level 3             |
| RTE           | GLOUCESTERSHIRE HOSPITALS NHS FOUNDATION TRUST                                                             | Level 3             |
| RN3           | GREAT WESTERN HOSPITALS NHS FOUNDATION TRUST                                                               | Level 3             |
| RWA           | HULL UNIVERSITY TEACHING HOSPITALS NHS TRUST                                                               | Level 3             |
| RNQ           | KETTERING GENERAL HOSPITAL NHS FOUNDATION TRUST                                                            | Level 3             |
| RD8           | MILTON KEYNES UNIVERSITY HOSPITAL NHS FOUNDATION TRUST                                                     | Level 3             |
| RGN           | NORTH WEST ANGLIA NHS FOUNDATION TRUST                                                                     | Level 3             |
| RNS           | NORTHAMPTON GENERAL HOSPITAL NHS TRUST                                                                     | Level 3             |
| RBZ           | NORTHERN DEVON HEALTHCARE NHS TRUST                                                                        | Level 3             |
| RX1           | NOTTINGHAM UNIVERSITY HOSPITALS NHS TRUST                                                                  | Level 3             |

|     |                                                                 |          |
|-----|-----------------------------------------------------------------|----------|
| RHW | ROYAL BERKSHIRE NHS FOUNDATION TRUST                            | Level 3  |
| REF | ROYAL CORNWALL HOSPITALS NHS TRUST                              | Level 3  |
| RH8 | ROYAL DEVON AND EXETER NHS FOUNDATION TRUST                     | Level 3  |
| RD1 | ROYAL UNITED HOSPITALS BATH NHS FOUNDATION TRUST                | Level 3  |
| RCU | SHEFFIELD CHILDREN'S NHS FOUNDATION TRUST                       | Level 3  |
| RHQ | SHEFFIELD TEACHING HOSPITALS NHS FOUNDATION TRUST               | Level 3  |
| RK5 | SHERWOOD FOREST HOSPITALS NHS FOUNDATION TRUST                  | Level 3  |
| RXW | SHREWSBURY AND TELFORD HOSPITAL NHS TRUST                       | Level 3  |
| RTR | SOUTH TEES HOSPITALS NHS FOUNDATION TRUST                       | Level 3  |
| RJC | SOUTH WARWICKSHIRE NHS FOUNDATION TRUST                         | Level 3  |
| RBA | TAUNTON AND SOMERSET NHS FOUNDATION TRUST                       | Level 3  |
| RL4 | THE ROYAL WOLVERHAMPTON NHS TRUST                               | Level 3  |
| RA9 | TORBAY AND SOUTH DEVON NHS FOUNDATION TRUST                     | Level 3  |
| RWD | UNITED LINCOLNSHIRE HOSPITALS NHS TRUST                         | Level 3  |
| RM2 | UNIVERSITY HOSPITAL OF SOUTH MANCHESTER NHS FOUNDATION TRUST    | Level 3  |
| RKB | UNIVERSITY HOSPITALS COVENTRY AND WARWICKSHIRE NHS TRUST        | Level 3  |
| RTG | UNIVERSITY HOSPITALS OF DERBY AND BURTON NHS FOUNDATION TRUST   | Level 3  |
| RJE | UNIVERSITY HOSPITALS OF NORTH MIDLANDS NHS TRUST                | Level 3  |
| RK9 | UNIVERSITY HOSPITALS PLYMOUTH NHS TRUST                         | Level 3  |
| RWP | WORCESTERSHIRE ACUTE HOSPITALS NHS TRUST                        | Level 3  |
| RA4 | YEOVIL DISTRICT HOSPITAL NHS FOUNDATION TRUST                   | Level 3  |
| RTK | ASHFORD AND ST PETER'S HOSPITALS NHS FOUNDATION TRUST           | Outreach |
| RDD | BASILDON AND THURROCK UNIVERSITY HOSPITALS NHS FOUNDATION TRUST | Outreach |
| RC9 | BEDFORDSHIRE HOSPITALS NHS FOUNDATION TRUST                     | Outreach |
| RDE | EAST SUFFOLK AND NORTH ESSEX NHS FOUNDATION TRUST               | Outreach |
| RXC | EAST SUSSEX HEALTHCARE NHS TRUST                                | Outreach |
| RGQ | IPSWICH HOSPITAL NHS TRUST                                      | Outreach |
| RJ2 | LEWISHAM AND GREENWICH NHS TRUST                                | Outreach |
| RWF | MAIDSTONE AND TUNBRIDGE WELLS NHS TRUST                         | Outreach |
| RPA | MEDWAY NHS FOUNDATION TRUST                                     | Outreach |
| RD3 | POOLE HOSPITAL NHS FOUNDATION TRUST                             | Outreach |
| RHU | PORTSMOUTH HOSPITALS UNIVERSITY NATIONAL HEALTH SERVICE TRUST   | Outreach |
| RA2 | ROYAL SURREY COUNTY HOSPITAL NHS FOUNDATION TRUST               | Outreach |
| RPR | ROYAL WEST SUSSEX NHS TRUST                                     | Outreach |
| RNZ | SALISBURY NHS FOUNDATION TRUST                                  | Outreach |
| RTP | SURREY AND SUSSEX HEALTHCARE NHS TRUST                          | Outreach |
| RCX | THE QUEEN ELIZABETH HOSPITAL, KING'S LYNN, NHS FOUNDATION TRUST | Outreach |
| RYR | WESTERN SUSSEX HOSPITALS NHS FOUNDATION TRUST                   | Outreach |

**Table S3.** Classification of hospital providers in Hospital Episode Statistics data by paediatric congenital heart disease level. Only horizontal model centres included.

| Provider Code | Provider Description | Paediatric CHD Level |
|---------------|----------------------|----------------------|
|---------------|----------------------|----------------------|

|     |                                                                |         |
|-----|----------------------------------------------------------------|---------|
| RBS | ALDER HEY CHILDREN'S NHS FOUNDATION TRUST                      | Level 1 |
| RQ3 | BIRMINGHAM WOMEN'S AND CHILDREN'S NHS FOUNDATION TRUST         | Level 1 |
| RP4 | GREAT ORMOND STREET HOSPITAL FOR CHILDREN NHS FOUNDATION TRUST | Level 1 |
| RCU | SHEFFIELD CHILDREN'S NHS FOUNDATION TRUST                      | Level 3 |

**Table S4.** Complexity classification assigned to each Primary Diagnosis category from the NCHDA records in the LAUNCHES dataset.

| Overall NCHDA diagnosis category                                                                                | ESC Complexity |
|-----------------------------------------------------------------------------------------------------------------|----------------|
| 1: Hypoplastic left heart syndrome                                                                              | severe         |
| 2: Functionally UVH                                                                                             | severe         |
| 3: Common arterial trunk (truncus arteriosus)                                                                   | severe         |
| 4: Transposition of great arteries & ventricular septal defect/Transposition-type double outlet right ventricle | severe         |
| 5: Interrupted Aortic Arch                                                                                      | severe         |
| 6: Transposition of great arteries & intact ventricular septum                                                  | moderate       |
| 7: Pulmonary atresia & intact ventricular septum                                                                | severe         |
| 8: Pulmonary atresia & ventricular septal defect                                                                | severe         |
| 9: Miscellaneous primary congenital disease                                                                     | ambiguous      |
| 10: Atrioventricular septal defect                                                                              | moderate       |
| 11: Tetralogy of Fallot /Fallot-type double outlet right ventricle                                              | moderate       |
| 12: Aortic valve stenosis (isolated)                                                                            | moderate       |
| 13: Tricuspid valve anomaly including Ebstein anomaly                                                           | moderate       |
| 14: Mitral valvar abnormality                                                                                   | moderate       |
| 15: Total anomalous pulmonary venous connection                                                                 | moderate       |
| 16: Aortic arch obstruction +/- ventricular septal defect +/- atrial septal defect                              | moderate       |
| 17: Pulmonary stenosis                                                                                          | moderate       |
| 18: Subaortic stenosis (isolated)                                                                               | moderate       |
| 19: Aortic regurgitation                                                                                        | moderate       |
| 20: Ventricular septal defect                                                                                   | mild           |
| 21: Atrial septal defect                                                                                        | mild           |
| 22: Patent arterial duct (PDA)                                                                                  | mild           |
| 23: Acquired paediatric heart disease                                                                           | ambiguous      |
| 24: Arrhythmia requiring procedure                                                                              | mild           |
| 25: Misc congenital terms                                                                                       | ambiguous      |
| Missing diagnosis                                                                                               | ambiguous      |

**Table S5.** Complexity classification assigned to each ICD-10 Diagnosis code from the HES records in the LAUNCHES dataset.

| ICD-10 Code | ICD-10 Description | ESC Complexity |
|-------------|--------------------|----------------|
|-------------|--------------------|----------------|

|       |                                                                          |           |
|-------|--------------------------------------------------------------------------|-----------|
| Q20   | Congenital malformations of cardiac chambers and connections             | ambiguous |
| Q20.0 | Common arterial trunk                                                    | severe    |
| Q20.1 | Double outlet right ventricle                                            | severe    |
| Q20.2 | Double outlet left ventricle                                             | severe    |
| Q20.3 | Discordant ventriculoarterial connection                                 | ambiguous |
| Q20.4 | Double inlet ventricle                                                   | severe    |
| Q20.5 | Discordant atrioventricular connection                                   | severe    |
| Q20.6 | Isomerism of atrial appendages                                           | severe    |
| Q20.8 | Other congenital malformations of cardiac chambers and connections       | ambiguous |
| Q20.9 | Congenital malformation of cardiac chambers and connections, unspecified | ambiguous |
| Q21   | Congenital malformations of cardiac septa                                | ambiguous |
| Q21.0 | Ventricular septal defect                                                | mild      |
| Q21.1 | Atrial septal defect                                                     | mild      |
| Q21.2 | Atrioventricular septal defect                                           | moderate  |
| Q21.3 | Tetralogy of Fallot                                                      | moderate  |
| Q21.4 | Aortopulmonary septal defect                                             | moderate  |
| Q21.8 | Other congenital malformations of cardiac septa                          | ambiguous |
| Q21.9 | Congenital malformation of cardiac septum, unspecified                   | ambiguous |
| Q22   | Congenital malformations of pulmonary and tricuspid valves               | moderate  |
| Q22.0 | Pulmonary valve atresia                                                  | severe    |
| Q22.1 | Congenital pulmonary valve stenosis                                      | moderate  |
| Q22.2 | Congenital pulmonary valve insufficiency                                 | moderate  |
| Q22.3 | Other congenital malformations of pulmonary valve                        | ambiguous |
| Q22.4 | Congenital tricuspid stenosis                                            | moderate  |
| Q22.5 | Ebstein anomaly                                                          | moderate  |
| Q22.6 | Hypoplastic right heart syndrome                                         | severe    |
| Q22.8 | Other congenital malformations of tricuspid valve                        | ambiguous |
| Q22.9 | Congenital malformation of tricuspid valve, unspecified                  | ambiguous |
| Q23   | Congenital malformations of aortic and mitral valves                     | ambiguous |
| Q23.0 | Congenital stenosis of aortic valve                                      | moderate  |
| Q23.1 | Congenital insufficiency of aortic valve                                 | moderate  |
| Q23.2 | Congenital mitral stenosis                                               | moderate  |
| Q23.3 | Congenital mitral insufficiency                                          | moderate  |
| Q23.4 | Hypoplastic left heart syndrome                                          | severe    |
| Q23.8 | Other congenital malformations of aortic and mitral valves               | ambiguous |
| Q23.9 | Congenital malformation of aortic and mitral valves, unspecified         | ambiguous |
| Q24   | Other congenital malformations of heart                                  | ambiguous |
| Q24.0 | Dextrocardia                                                             | ambiguous |
| Q24.1 | Laevocardia                                                              | ambiguous |
| Q24.2 | Cor triatriatum                                                          | ambiguous |
| Q24.3 | Pulmonary infundibular stenosis                                          | moderate  |
| Q24.4 | Congenital subaortic stenosis                                            | moderate  |
| Q24.5 | Malformation of coronary vessels                                         | moderate  |
| Q24.6 | Congenital heart block                                                   | ambiguous |

|       |                                                        |           |
|-------|--------------------------------------------------------|-----------|
| Q24.8 | Other specified congenital malformations of heart      | ambiguous |
| Q24.9 | Congenital malformation of heart, unspecified          | ambiguous |
| Q25   | Congenital malformations of great arteries             | ambiguous |
| Q25.0 | Patent ductus arteriosus                               | mild      |
| Q25.1 | Coarctation of aorta                                   | moderate  |
| Q25.2 | Atresia of aorta                                       | severe    |
| Q25.3 | Stenosis of aorta                                      | moderate  |
| Q25.4 | Other congenital malformations of aorta                | ambiguous |
| Q25.5 | Atresia of pulmonary artery                            | severe    |
| Q25.6 | Stenosis of pulmonary artery                           | moderate  |
| Q25.7 | Other congenital malformations of pulmonary artery     | ambiguous |
| Q25.8 | Other congenital malformations of great arteries       | ambiguous |
| Q25.9 | Congenital malformation of great arteries, unspecified | ambiguous |
| Q26   | Congenital malformations of great veins                | ambiguous |
| Q26.0 | Congenital stenosis of vena cava                       | ambiguous |
| Q26.1 | Persistent left superior vena cava                     | ambiguous |
| Q26.2 | Total anomalous pulmonary venous connection            | moderate  |
| Q26.3 | Partial anomalous pulmonary venous connection          | moderate  |
| Q26.4 | Anomalous pulmonary venous connection, unspecified     | moderate  |
| Q26.5 | Anomalous portal venous connection                     | ambiguous |
| Q26.6 | Portal vein-hepatic artery fistula                     | ambiguous |
| Q26.8 | Other congenital malformations of great veins          | ambiguous |
| Q26.9 | Congenital malformation of great vein, unspecified     | ambiguous |
| Q87.4 | Marfan syndrome                                        | moderate  |
| Q89.3 | Situs inversus                                         | ambiguous |
| Z95.2 | Presence of prosthetic heart valve                     | moderate  |

**Table S6.** Complexity classification assigned to each Specific Procedure category from the NCHDA records in the LAUNCHES dataset.

| <b>NCHDA specific procedure category</b>                         | <b>ESC Complexity</b> |
|------------------------------------------------------------------|-----------------------|
| 01: Norwood procedure                                            | severe                |
| 02: Heart transplant                                             | exclusion             |
| 03: Lung transplant (includes heart and lung transplant)         | exclusion             |
| 05: Common arterial trunk (truncus arteriosus) repair            | severe                |
| 06: Double Switch or Rastelli-Senning repair of ccTGA a          | severe                |
| 07: Double Switch or Rastelli-Senning repair of ccTGA b          | severe                |
| 08: Senning or Mustard procedure (atrial switch)                 | ambiguous             |
| 09: Rastelli or REV procedure                                    | severe                |
| 10: Complex procedure for transposed great arteries              | severe                |
| 12: Arterial switch and ventricular septal defect (VSD) repair   | severe                |
| 13: Arterial switch                                              | moderate              |
| 15: Totally anomalous pulmonary venous connection (TAPVC) repair | moderate              |
| 16: Fontan or Total Cavopulmonary Connection (TCPC)              | severe                |
| 17: Glenn (Cavopulmonary (CP) shunt)                             | severe                |



|                                                                                                                         |           |
|-------------------------------------------------------------------------------------------------------------------------|-----------|
| 19: Atrioventricular septal defect (AVSD) & Tetralogy of Fallot repair                                                  | moderate  |
| 20: Complete atrioventricular septal defect (AVSD) repair                                                               | moderate  |
| 21: Partial atrioventricular septal defect (AVSD) repair                                                                | moderate  |
| 22: Mitral_valve_replacement                                                                                            | moderate  |
| 23: Ross-Konno procedure a                                                                                              | moderate  |
| 24: Ross-Konno procedure b                                                                                              | moderate  |
| 25: Ross procedure (aortic valve-root replacement with pulmonary autograph)                                             | moderate  |
| 26: Aortic root replacement (non-Ross)                                                                                  | moderate  |
| 27: Aortic valve replacement (non-Ross)                                                                                 | moderate  |
| 28: Tricuspid valve replacement                                                                                         | moderate  |
| 29: Pulmonary valve replacement                                                                                         | moderate  |
| 30: Mitral valve repair                                                                                                 | moderate  |
| 31: Aortic valve repair                                                                                                 | moderate  |
| 32: Tricuspid valve repair                                                                                              | moderate  |
| 33: Pulmonary atresia & ventricular septal defect (VSD) repair                                                          | severe    |
| 34: Systemic-to-pulmonary collateral artery (MAPCA) unifocalisation procedure                                           | severe    |
| 35: Tetralogy of Fallot with absent pulmonary valve repair                                                              | moderate  |
| 36: Tetralogy of Fallot and Fallot-type double outlet right ventricle repair                                            | moderate  |
| 37: Right ventricle to pulmonary arterial conduit                                                                       | moderate  |
| 38: Ventricular septal defect and right ventricular outflow tract obstruction repair                                    | moderate  |
| 39: Supravalvar aortic stenosis repair                                                                                  | moderate  |
| 40: Subaortic stenosis repair                                                                                           | moderate  |
| 42: Anomalous coronary artery repair                                                                                    | moderate  |
| 43: Cor triatriatum (divided left atrium) repair                                                                        | moderate  |
| 44: Isolated pulmonary trunk band (PA band)                                                                             | ambiguous |
| 45: Systemic-to-pulmonary arterial shunt procedure (includes Blalock-Taussig & central shunts)                          | severe    |
| 46: Interrupted aortic arch repair                                                                                      | severe    |
| 47: Isolated coarctation/hypoplasia of aorta repair                                                                     | moderate  |
| 48: Pulmonary vein stenosis repair                                                                                      | moderate  |
| 49: Replacement of cardiac conduit                                                                                      | ambiguous |
| 50: Closure of multiple ventricular septal defects (VSD)                                                                | mild      |
| 51: Ventricular septal defect (VSD) closure - surgical                                                                  | mild      |
| 52: Sinus venosus atrial septal defect (ASD) closure and partially anomalous pulmonary venous connection (PAPVC) repair | mild      |
| 53: Vascular ring repair                                                                                                | mild      |
| 54: Atrial septal defect (ASD) closure - surgical                                                                       | mild      |
| 55: Patent arterial duct (PDA) closure - surgical                                                                       | mild      |
| 56: Arrhythmia-related surgical procedure                                                                               | moderate  |
| 57: Permanent epicardial pacemaker system placement                                                                     | moderate  |
| 58: Stent placement in arterial duct (PDA)                                                                              | severe    |
| 59: pulmonary valve replacement: transluminal                                                                           | moderate  |
| 60: Stent placement in right ventricular outflow tract (RVOT)                                                           | moderate  |

|                                                                                                             |           |
|-------------------------------------------------------------------------------------------------------------|-----------|
| 61: Transluminal pulmonary valve perforation & dilation                                                     | severe    |
| 62: Blade atrial septostomy                                                                                 | ambiguous |
| 63: Balloon atrial septostomy by pull back                                                                  | moderate  |
| 64: Balloon dilation and/or stenting of pulmonary vein                                                      | severe    |
| 65: Stent placement at site of aortic coarctation                                                           | moderate  |
| 66: Balloon dilation of native aortic coarctation-hypoplasia                                                | moderate  |
| 67: Balloon dilation of aortic re-coarctation                                                               | moderate  |
| 68: Balloon dilation of aortic valve                                                                        | moderate  |
| 69: Balloon dilation of pulmonary valve                                                                     | moderate  |
| 70: Transluminal ventricular septal defect (VSD) closure                                                    | mild      |
| 71: Transluminal patent foramen ovale (PFO) closure                                                         | mild      |
| 72: Transluminal atrial septal defect (ASD) closure                                                         | mild      |
| 73: Transluminal patent arterial duct (PDA) closure                                                         | mild      |
| 74: Stent placement in pulmonary artery                                                                     | moderate  |
| 75:pa ballooning                                                                                            | moderate  |
| 76: Transluminal systemic-to-pulmonary collateral artery (MAPCA) procedure                                  | ambiguous |
| 77: Stent or balloon dilation of cardiac conduit                                                            | moderate  |
| 78: Stent redilation                                                                                        | moderate  |
| 79: Transluminal ablation procedure for arrhythmia                                                          | mild      |
| 80: Implantable cardioverter & defibrillator (ICD) implantation                                             | moderate  |
| 82: Biventricular implantable cardioverter & defibrillator (ICD) implantation or pacemaker system placement | moderate  |
| 83: Pacemaker system placement or generator replacement - surgical                                          | moderate  |
| 84: Pacemaker lead procedure                                                                                | moderate  |
| 85: Miscellaneous electrophysiology (EP) procedures                                                         | mild      |
| 86: Diagnostic electrophysiological study (EPS)                                                             | mild      |
| 87: Catheter diagnostic                                                                                     | mild      |
| 99: Unallocated                                                                                             | ambiguous |

**Figure S2. Severe and Moderate patient group estimated probability of transfer if alive by era, sex, ethnicity, and deprivation over the follow-up period between 16<sup>th</sup> and 20<sup>th</sup> birthdays.** The estimated probabilities conditional on survival of patients take into account the mortality and censoring of patients.

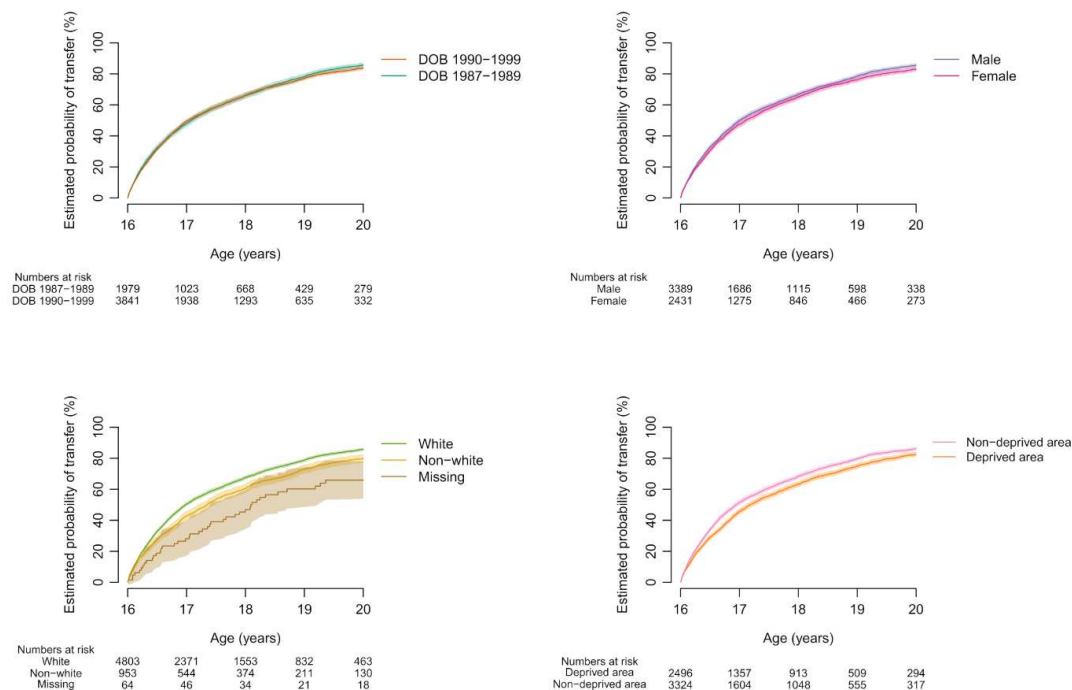

**Notes.** The CPFs by birth cohort were not significantly different (Pepe-Mori test p-value 0.575). The male vs female CPFs was narrowly significantly different (Pepe-Mori test p-value 0.047). The ethnicity CPFs were significantly different pairwise (Pepe-Mori test p-values <0.001 for white against non-white or missing, and p-value 0.014 for non-white compared to missing). The CPFs by area deprivation were significantly different (Pepe-Mori test p-value <0.001).
